# Supplementary material
Source: Springer Nature journal article supplement (https://www.springermedizin.de/resource/supplementary/12936_2007_422_MOESM3_ESM.pdf/9547418)

3A.

Mboula (*An. gambiae* s.l.)

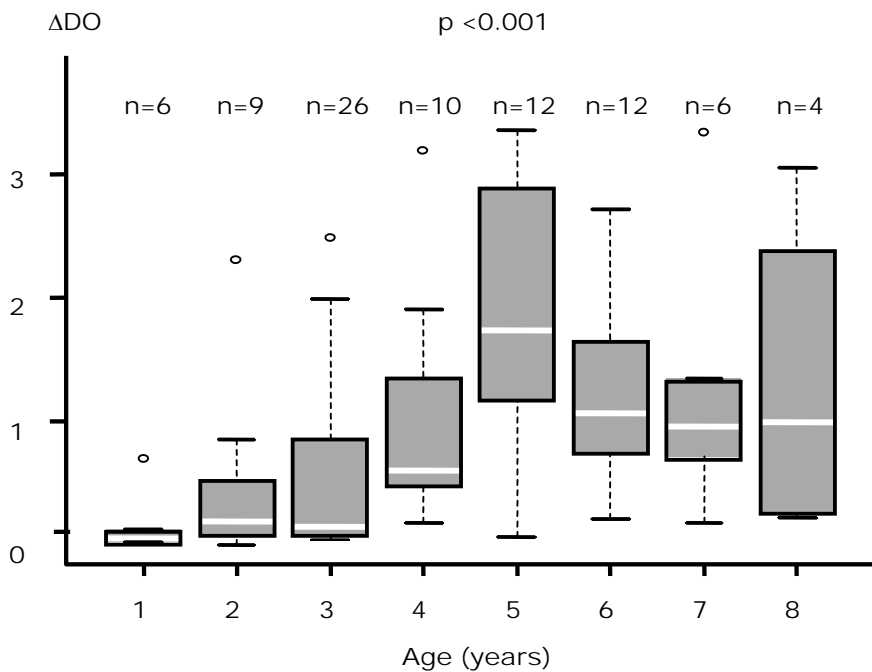

3B.

Gankette. Balla (*An. funestus*)

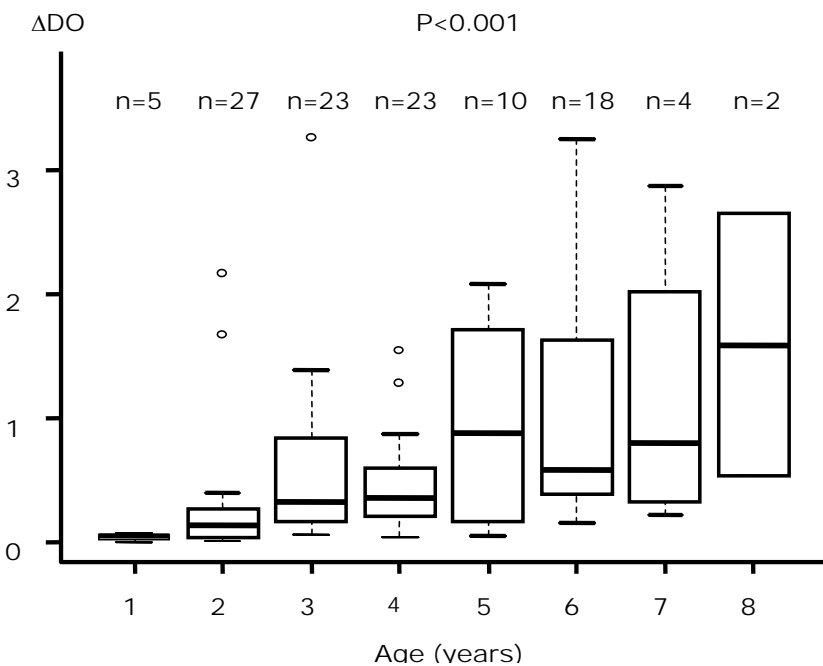

Supplement: MOESM3 [file 9547418]
